# Supplementary material for: Activity Determinants of Helical Antimicrobial Peptides: A Large-Scale Computational Study
Source: PubMed Central journal article supplement (PMC3680375; doi:10.1371/journal.pone.0066440), 2013-06-12
Supplement: pone.0066440.s001.pdf [file pone.0066440.s001.pdf]

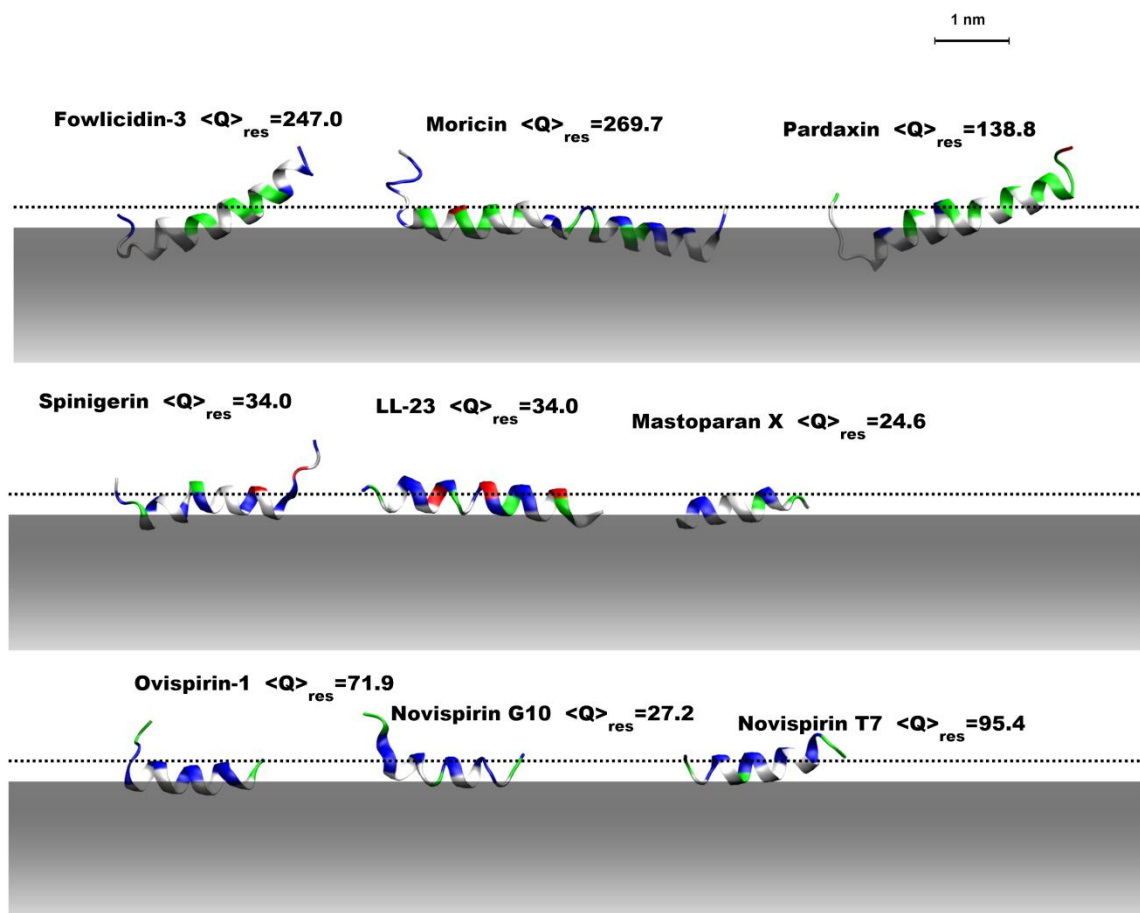

**Figure S1. Conformations of various antimicrobial peptides with their hydrophobic quadrupole moments.**

The lowest energy conformations in the last 2ns of 4 ns implicit simulations on 30% anionic membrane are shown with their corresponding  $\langle Q \rangle_{res}$ . The grey areas indicate the hydrophobic core of the membrane. The dotted lines indicate the location of the phosphate groups. The colors on the peptides indicate the residue type: Red: acidic; Blue: basic; white: polar; green: uncharged polar.
