# Supplementary material for: Activity Determinants of Helical Antimicrobial Peptides: A Large-Scale Computational Study
Source: PubMed Central journal article supplement (PMC3680375; doi:10.1371/journal.pone.0066440), 2013-06-12
Supplement: pone.0066440.s002.pdf [file pone.0066440.s002.pdf]

**Table S1. Compilation of experimental membrane binding free energies of AMPs, in the molarity standard state.**

The listed experiments are carried out in temperature close to room temperature. Unless specifically stated, the room temperature is assumed to be 25 °C. a-f, the conversion and correction done to the peptides. No conversion is needed for those articles reporting  $\Delta G_c$  (ref7, ref 22 and ref 24).

- Converted from  $\Delta G_{app}$ . With Gouy-Chapman correction, where in the parenthesis is the effective charge of the peptide and after the slash is the energy value with electrostatic interaction added back.
- Converted from  $\Delta G_{app}$ . The  $\Delta G_{app}$  is measured at low peptide/lipid ratio. If present, the value inside the parenthesis is the peptide concentration at which the  $K_{app}$  was measured.
- Converted from  $\Delta G_a$ , which is independent of peptide concentration.  $\Delta G_c = RT \ln(K_d v_L)$ .
- Converted from  $\Delta G_a$  but considering the binding site size.  $\Delta G_c = RT \ln(n K_d v_L)$ . The binding site size  $n$  is in the parenthesis.
- Converted from  $\Delta G_x$ .
- Monolayer correction applied, where the peptide is considered to bind only to the outer leaflet of the membrane ( the effective lipid volume  $V_L = 0.6 V_L$ ).
- Interpolated.

In red font are the data used in Figure 3.

| Peptide           | Sequence                             | Method                | Membrane                                                                                | Binding Energy $\Delta G_c^0$ (kcal/mol)                                                                   | Original Data                                                                                                             | Ref |
|-------------------|--------------------------------------|-----------------------|-----------------------------------------------------------------------------------------|------------------------------------------------------------------------------------------------------------|---------------------------------------------------------------------------------------------------------------------------|-----|
| Magainin          | GIGKFLHSAKKFG<br>KAFVGEIMNS-NH2      | ITC                   | POPC/POPG(75:25)                                                                        | -2.54 (3.7-3.8)/-7.50 <sup>a</sup><br>-5.72 (1 $\mu$ M) <sup>b</sup>                                       | $K_{app}=55.5 \text{ M}^{-1}$<br>$K_{app}=1.2 \times 10^4 \text{ M}^{-1}$                                                 | [1] |
|                   |                                      | ITC                   | POPC SUV                                                                                | -4.74 <sup>a</sup>                                                                                         | $K_{app}=2000 \text{ M}^{-1}$<br>under 30 °C                                                                              | [2] |
|                   |                                      | ITC                   | POPC/POPG 3:1<br>LUV<br>SUV                                                             | -3.14/-8.16 <sup>a</sup><br>-2.64/-7.65 <sup>a</sup>                                                       | under 45 °C<br>$K_{app}=110 \text{ M}^{-1}$<br>$K_{app}=50 \text{ M}^{-1}$                                                | [3] |
|                   |                                      | ITC                   | POPC/POPG (3:1)<br>SUV<br>POPC SUV                                                      | -6.0 <sup>b</sup><br>-3.7 <sup>b</sup>                                                                     | $K_{app}=2 \times 10^4 \text{ M}^{-1}$<br>$K_{app}=400 \text{ M}^{-1}$<br>under 23 °C                                     | [4] |
|                   |                                      | CD titration          | POPC:POPG(3:1)                                                                          | -5.98(0M) <sup>b</sup>                                                                                     | $K_{app}=2 \times 10^4 \text{ M}^{-1}$                                                                                    | [5] |
|                   |                                      | Fluorescence Kinetics | POPC:POPG(1:1)<br>POPC:POPG(7:3)<br>POPC:POPG(8:2)<br>POPC:POPG(9:1)<br>POPC:POPG(10:0) | -7.99 <sup>c</sup><br>-6.23 <sup>c</sup><br>-5.56 <sup>c</sup><br>-4.84 <sup>c</sup><br>-3.30 <sup>c</sup> | $K_d=1.8 \mu\text{M}$<br>$K_d=35 \mu\text{M}$<br>$K_d=110 \mu\text{M}$<br>$K_d=370 \mu\text{M}$<br>$K_d=5000 \mu\text{M}$ | [6] |
| I6A8L15I17-M2a    | GIGKFIHAAK<br>KFGKLFIGEI<br>MNS(NH2) | ITC                   | POPC SUV                                                                                | -5.6 <sup>a</sup>                                                                                          | $K_{app}=7700 \text{ M}^{-1}$<br>under 30 °C                                                                              | [2] |
| I6V9W12T15I17-M2a | GIGKFIHSAKKWG<br>KTFIGEI<br>MNS(NH2) | ITC                   | POPC SUV                                                                                | -6.1 <sup>a</sup>                                                                                          | $K_{app}=20000 \text{ M}^{-1}$<br>under 30 °C                                                                             |     |
| I6L15-M2a         | GIGKFIHSAKKFGK<br>LFVGEIMNS-NH2      | CD titration          | POPC:POPG(3:1)                                                                          | -6.11(0M) <sup>b</sup>                                                                                     | $K_{app}=25000 \text{ M}^{-1}$                                                                                            | [5] |
| L2R11A20-M2a      | GLGKFLHSAKRFG<br>KAFVGEAMNS-NH2      |                       | POPC:POPG(3:1)                                                                          | -5.40(0M) <sup>b</sup>                                                                                     | $K_{app}=7400 \text{ M}^{-1}$                                                                                             |     |
| I6A8L15I17-M2a    | GIGKFIHAAKKFG<br>KLFIGEIMNS-NH2      |                       | POPC:POPG(3:1)                                                                          | -6.96(0M) <sup>b</sup>                                                                                     | $K_{app}=105000 \text{ M}^{-1}$                                                                                           |     |
| PGLa              | GMASKAGAIAGKI<br>AKVALKAL-NH2        | ITC LUV               | POPC/POPG(3:1)<br>POPC                                                                  | -4.5(5)/-11.1 <sup>a</sup><br>-4.1 <sup>a</sup>                                                            | $K_{app}=1500 \text{ M}^{-1}$<br>$K_{app}=800 \text{ M}^{-1}$<br>under 30 °C                                              | [2] |

(continued in next page)

(Continued from previous page)

| Peptide            | Sequence                                                              | Method                                                                                                        | Membrane                                                               | Binding Energy<br>$\Delta G_c^0$ (kcal/mol)                         | Original Data                                                                                             | Ref     |
|--------------------|-----------------------------------------------------------------------|---------------------------------------------------------------------------------------------------------------|------------------------------------------------------------------------|---------------------------------------------------------------------|-----------------------------------------------------------------------------------------------------------|---------|
| Melittin           | GIGAVLKVLTTGL<br>PALISWIKRKRQQ-<br>NH <sub>2</sub>                    | Surface potential measurement                                                                                 | Lethicin                                                               | -7.55(10mM Salt) <sup>f</sup><br>-7.96(100mM Salt) <sup>f</sup>     |                                                                                                           | [7]     |
|                    |                                                                       | CD                                                                                                            | POPC/POPG(9:1)                                                         | -6.5(1.9)/-7.7 <sup>a,f</sup><br>-6.3 (0.77 $\mu$ M) <sup>b,f</sup> | $K_{app}=4.5 \times 10^4 M^{-1}$<br>$K_{app}=3.19 \times 10^4 M^{-1}$<br>$K_{app}=4.5 \times 10^4 M^{-1}$ | [8]     |
|                    |                                                                       |                                                                                                               | POPC/POPG(8:2)                                                         | -6.5/-8.2 <sup>a,f</sup>                                            |                                                                                                           |         |
|                    |                                                                       | Fluorescence NBD                                                                                              | POPC LUV <sub>200</sub>                                                | -4.92(2.2) <sup>a,f</sup>                                           | $K_{app}=6 \times 10^3 M^{-1}$                                                                            | [9]     |
|                    |                                                                       |                                                                                                               | LUV <sub>100</sub>                                                     | -4.82(1.5) <sup>a,f</sup>                                           | $K_{app}=5 \times 10^3 M^{-1}$                                                                            |         |
|                    |                                                                       |                                                                                                               | SUV                                                                    | -5.16(1.2) <sup>a,f</sup>                                           | $K_{app}=9 \times 10^3 M^{-1}$                                                                            |         |
|                    |                                                                       | DOPC LUV <sub>200</sub>                                                                                       | -4.82(1.6) <sup>a,f</sup>                                              | $K_{app}=5 \times 10^3 M^{-1}$                                      | under 30 °C                                                                                               |         |
| LUV <sub>100</sub> | -5.01(1.3) <sup>a,f</sup>                                             |                                                                                                               | $K_{app}=7 \times 10^3 M^{-1}$                                         |                                                                     |                                                                                                           |         |
| Ultrafiltration    | EPC<br>EPC:PS(85:15)                                                  | -5.1 <sup>e,f</sup><br>-6.4 <sup>e,f</sup>                                                                    | $\Delta G_x=-7.6$ kcal/mol<br>$\Delta G_x=-8.9$ kcal/mol               | [10]                                                                |                                                                                                           |         |
| Ultrafiltration    | DOPC                                                                  | -5.1 <sup>e,f</sup>                                                                                           | $\Delta G_x=-7.6$ kcal/mol                                             | [11]                                                                |                                                                                                           |         |
| CD                 | POPC/POPG(10:0)<br>POPC/POPG(9:1)<br>POPC/POPG(3:1)<br>POPC/POPG(1:1) | -3.7 <sup>e,f</sup><br>-4.3(1.0)/-5.5 <sup>e,f</sup><br>-4.62/-6.0 <sup>e,f</sup><br>-5.0/-6.4 <sup>e,f</sup> | $\Delta G_x=$ kcal/mol<br>-6.2<br>-6.8/-8.0<br>-7.12/-8.5<br>-7.5/-8.9 | [12]                                                                |                                                                                                           |         |
| Pardaxin           | GFFALIPKIHSSPLF<br>KTLLSAVGSALSSS<br>GGQE                             | Fluorescence NBD-label                                                                                        | POPC<br>LPS                                                            | -6.21 <sup>b,f</sup><br>-7.1 <sup>c</sup>                           | $K_{app}=3.3 \times 10^4 M^{-1}$<br>$K_d=8.5 \mu M$                                                       | [13,14] |
| Dermaseptin        | GLWSKIKAAAGKEA<br>AKAAAKAAGKAA<br>LNAVSEAV                            | Fluorescence NBD-label                                                                                        | PC<br>PC/PS(1:1)                                                       | -5.28 <sup>b,f</sup><br>-6.12 <sup>b,f</sup>                        | $K_{app}=6.6 \times 10^3 M^{-1}$<br>$K_{app}=2.8 \times 10^4 M^{-1}$                                      | [15]    |
| Dermaseptin S1     | ALWKTMLKKLGT<br>MALHAGKAALGA<br>AADTISQGTQ                            | Surface Plasmon Resonance                                                                                     | PC<br>PC/PA(1:1)                                                       | -6.47 <sup>c,f</sup><br>-8.0 <sup>c,f</sup>                         | $K_d=14.29 \mu M$<br>$K_d=1.01 \mu M$                                                                     | [16]    |
| Dermaseptin S4     | ALWMTLLKKVLK<br>AALNAVLGANA                                           |                                                                                                               | PC<br>PC/PA(1:1)                                                       | -8.86 <sup>c,f</sup><br>-9.64 <sup>c,f</sup>                        | $K_d=0.25 \mu M$<br>$K_d=0.067 \mu M$                                                                     |         |
| K4K20-S4           | ALWKTLLKKVLK<br>AAAKAALKAVLV<br>GANA                                  |                                                                                                               | PC/PA(1:1)                                                             | -9.68 <sup>c,f</sup>                                                | $K_d=0.0625 \mu M$                                                                                        |         |
| K4-S4(1-16)a       | ALWKTLLKKVLK<br>AAAK-NH <sub>2</sub>                                  |                                                                                                               | PC/PA(1:1)                                                             | -8.10 <sup>c,f</sup>                                                | $K_d=0.91 \mu M$                                                                                          |         |
| K4-S4(1-13)a       | ALWKTLLKKVLK<br>A-NH <sub>2</sub>                                     |                                                                                                               | PC/PA(1:1)                                                             | -6.68 <sup>c,f</sup>                                                | $K_d=10 \mu M$                                                                                            |         |
| K4-S4(1-10)a       | ALWKTLLKKV-<br>NH <sub>2</sub>                                        |                                                                                                               | PC/PA(1:1)                                                             | -5.01 <sup>c,f</sup>                                                | $K_d=167 \mu M$                                                                                           |         |
| DD K               | GLWSKIKAAAG-<br>KEAAKAAGKAAL<br>NAVSEAV-NH <sub>2</sub>               |                                                                                                               | ITC                                                                    | PC-LUVs                                                             | -3.97 (9.7) <sup>d,f</sup>                                                                                |         |

(continued in next page)

(Continued from previous page)

| Peptide                      | Sequence                                              | Method                   | Membrane                                                              | Binding Energy<br>$\Delta G_c^0$ (kcal/mol)                                                  | Original Data                                                                                     | Ref  |
|------------------------------|-------------------------------------------------------|--------------------------|-----------------------------------------------------------------------|----------------------------------------------------------------------------------------------|---------------------------------------------------------------------------------------------------|------|
| CecropinP                    | SWLSKTAKKLENS<br>AKKRISGIAIAIQ<br>GGPR                | Fluorescence<br>NBD      | PC<br>PC/PS(1:1)                                                      | -5.98 <sup>b,f</sup><br>-6.78 <sup>b,f</sup>                                                 | $K_{app}=3.1 \times 10^3 \text{ M}^{-1}$<br>$K_{app}=1.2 \times 10^5 \text{ M}^{-1}$              | [18] |
| CecropinA                    | KWKLFKKIEKVGQ<br>NIBDGIKAGPAVA<br>WGQATQIAK-NH2       | Fluorescence<br>kinetics | POPC:POPG(1:1)<br>POPC:POPG(7:3)<br>POPC:POPG(8:2)<br>POPC:POPG(10:0) | -8.88 <sup>c,f</sup><br>-5.66 <sup>c,f</sup><br>-5.03 <sup>c,f</sup><br>-3.95 <sup>c,f</sup> | $K_d=0.24 \mu\text{M}$<br>$K_d=56 \mu\text{M}$<br>$K_d=270 \mu\text{M}$<br>$K_d=1000 \mu\text{M}$ | [19] |
|                              |                                                       | Fluorescence<br>Trp      | POPC:POPA(8:2)                                                        | -5.92 (27.8) <sup>d,f</sup>                                                                  | $K_d=1.28 \mu\text{M}$                                                                            | [20] |
| $\delta$ -lysin              | formyl-<br>MAQDIISTIGDLVK<br>WIIDTVNKFTKK             | Fluorescence<br>Kinetics | POPC                                                                  | -6.0 <sup>c,f</sup>                                                                          | $K_d=30 \mu\text{M}$                                                                              | [21] |
| DL-1<br>$\delta$ -lysin D->K | formyl-<br>MAQKIISTIGKLVK<br>WIIKTVNKFTKK             |                          | POPC                                                                  | -4.5 <sup>c,f</sup>                                                                          | $K_d=400 \mu\text{M}$                                                                             |      |
| DL-2a                        | formyl-<br>LAADLLAALGDLA<br>KWLLDALAKAAK<br>K         |                          | POPC                                                                  | -4.9 <sup>c,f</sup>                                                                          | $K_d=200 \mu\text{M}$                                                                             |      |
| DL-2b                        | formyl-<br>LAADLLAALGDLL<br>KWLLDALAKLAK<br>K         |                          | POPC                                                                  | -3.2 <sup>c,f</sup>                                                                          | $K_d=3400 \mu\text{M}$                                                                            |      |
| CE-1                         | KWKLLKKLEKAG<br>AALKEGLLKAGPA<br>LALLGAAAALAK-<br>NH2 |                          | POPC                                                                  | -4.5 <sup>c,f</sup>                                                                          | $K_d=400 \mu\text{M}$                                                                             |      |
| CE-2                         | KWKLLKKLEKAG<br>AALKEGLLKAGPA<br>LALLGAAAALAK-<br>NH2 |                          | POPC                                                                  | -3.0 <sup>c,f</sup>                                                                          | $K_d=4700 \mu\text{M}$                                                                            |      |
| MG-1                         | GILKFLESAKKWL<br>EAFLAEIMNS                           |                          | POPC                                                                  | -4.9 <sup>c,f</sup>                                                                          | $K_d=200 \mu\text{M}$                                                                             |      |
| MG-2                         | GLGKLLHAAKKL<br>GKAWLGELLAA                           |                          | POPC                                                                  | -3.9 <sup>c,f</sup>                                                                          | $K_d=1100 \mu\text{M}$                                                                            |      |
| Tp10W                        | AGWLLGKINLKAL<br>AALAKKIL-NH2                         | Fluorescence<br>Kinetics | POPC                                                                  | -5.1 <sup>c,f</sup>                                                                          | $K_d=140 \mu\text{M}$                                                                             | [22] |
| Tp10W-COO                    | AGWLLGKINLKAL<br>AALAKKIL                             |                          | POPC                                                                  | -4.9 <sup>c,f</sup>                                                                          | $K_d=200 \mu\text{M}$                                                                             |      |
| Tp10-7MC                     | AGYLLGK(-<br>7MC)INLKALAALA<br>KKIL-amide             |                          | POPC                                                                  | -6.3 <sup>c,f</sup>                                                                          | $K_d=20 \mu\text{M}$                                                                              |      |
| mastoparan X                 | INWKGIAAMAKKL<br>L-NH2                                |                          | POPC                                                                  | -4.7 <sup>c,f</sup>                                                                          | $K_d=300 \mu\text{M}$                                                                             |      |

(continued in next page)

(Continued from previous page)

| Peptide               | Sequence                                           | Method                                      | Membrane                                                    | Binding Energy<br>$\Delta G_c^0$ (kcal/mol)                                                                                           | Original Data                                                                                                           | Ref                  |
|-----------------------|----------------------------------------------------|---------------------------------------------|-------------------------------------------------------------|---------------------------------------------------------------------------------------------------------------------------------------|-------------------------------------------------------------------------------------------------------------------------|----------------------|
| Alamethicin           | AibPAibAibAibAibQ<br>AibVAibGLAibPVai<br>bAibEQPhl | EPR                                         | DOPC                                                        | -5.77 <sup>f</sup>                                                                                                                    | $K_c=17100$                                                                                                             | [23]                 |
| Gramicidin S<br>14dK4 | cyclo[VKLDKvDYPL<br>KVKLDYP]                       | ITC LUV                                     | POPC/POPG(3:1)<br>POPC/POPS(3:1)<br>POPG<br>POPS<br>POPC    | -6.2 (11.1) <sup>d</sup><br>-6.5 (14.3) <sup>d</sup><br>-8.3 (5) <sup>d</sup><br>-7.6 (5.3) <sup>d</sup><br>-2.0 (166.7) <sup>d</sup> | $K_d=3.1 \mu\text{M}$<br>$K_d=1.7 \mu\text{M}$<br>$K_d=22 \mu\text{M}$<br>$K_d=62 \mu\text{M}$<br>$K_d=278 \mu\text{M}$ | [24]                 |
| CM15                  | KWKLFKKIGAVLK<br>VL                                | Tryptophan<br>time-resolved<br>fluorescence | DMPC<br>DMPG                                                | -4.72<br>-5.49                                                                                                                        | $K_c=2.9 \times 10^3$<br>$K_c=1.06 \times 10^4$                                                                         | [25]                 |
|                       |                                                    | EPR                                         | POPE/POPG(8:2)                                              | -4.86 <sup>b,f</sup>                                                                                                                  | $K_{app}=0.28 \times 10^4 \text{ M}^{-1}$                                                                               | [26]                 |
| LL37(F27W)            | LLGDFFRKSKEKIG<br>KEFKRIVQRIKDFL<br>RNLVPRTES      | Tryptophan<br>fluorescence                  | SOPC<br>SOPCPOPG(9:1)<br>SOPCPOPG(8:2)<br><br>SOPCPOPG(6:4) | -6.16 <sup>c,f</sup><br>-8.44 <sup>c,f</sup><br>-8.58 <sup>c,f</sup><br>-8.79 <sup>c,f,g</sup><br>-9.29 <sup>c,f</sup>                | $K_d=23.8 \mu\text{M}$<br>$K_d=0.51 \mu\text{M}$<br>$K_d=0.40 \mu\text{M}$<br><br>$K_d=0.12 \mu\text{M}$                | [27]                 |
|                       |                                                    |                                             | Indolicidin                                                 | ILPWKWPWWPWR<br>R-NH 2                                                                                                                | ITC<br>LUV                                                                                                              | POPC<br>E Coli lipid |
| Tritrpticin           | VRRFPWWWPFLR<br>R-COO <sup>-</sup>                 | Reverse HPLC<br>LUV                         | POPC<br>POPG                                                | -6.3 <sup>e,f</sup><br>-9.0 <sup>e,f</sup>                                                                                            | $\Delta G_x=-8.8 \text{ kcal/mol}$<br>$\Delta G_x=-11.5 \text{ kcal/mol}$                                               | [29]                 |
|                       |                                                    | ITC<br>LUV                                  | POPE/POPG(7:3)<br>POPC<br>E Coli lipid                      | -8.59 <sup>c,f</sup><br>-5.63 <sup>c,f</sup><br>-8.14 <sup>c,f</sup>                                                                  | $\Delta G_a=-8.73 \text{ kcal/mol}$<br>$\Delta G_a=-5.77 \text{ kcal/mol}$<br>$\Delta G_a=-8.28 \text{ kcal/mol}$       | [28]                 |
| Tritrp1               | VRRFPWWWPFLR<br>R-NH2                              |                                             | POPE/POPG(7:3)<br>POPC                                      | -9.86 <sup>c,f</sup><br>-6.75 <sup>c,f</sup>                                                                                          | $\Delta G_a=-10.0 \text{ kcal/mol}$<br>$\Delta G_a=-6.89 \text{ kcal/mol}$                                              | [30]                 |
| Tritrp2               | VKKFPWWWPFLK<br>K-NH2                              |                                             | POPC                                                        | -5.28 <sup>c,f</sup>                                                                                                                  | $\Delta G_a=-5.42 \text{ kcal/mol}$                                                                                     |                      |
| Tritrp3               | VRRFAWWWA<br>FLRR-NH2                              |                                             | POPE/POPG(7:3)<br>POPC                                      | -9.09 <sup>c,f</sup><br>-6.99 <sup>c,f</sup>                                                                                          | $\Delta G_a=-9.23 \text{ kcal/mol}$<br>$\Delta G_a=-7.13 \text{ kcal/mol}$                                              |                      |
| LAP1                  | QPEWFKARRWQW<br>RMKKLGA                            | Fluorescence<br>Trp                         | DMPC:DMPG 1:1                                               | -6.47 (19.5) <sup>d,f</sup>                                                                                                           | $K_d=0.728 \mu\text{M}$                                                                                                 | [31]                 |
| LAP2                  | TISQPEWFKARRW<br>QWRMKKLGA                         |                                             |                                                             | -6.53 (22.0) <sup>d,f</sup>                                                                                                           | $K_d=0.581 \mu\text{M}$                                                                                                 |                      |
| LAP3                  | TISQA EWFKARRW<br>QWRMKKLGA                        |                                             |                                                             | -6.19 (21.0) <sup>d,f</sup>                                                                                                           | $K_d=1.09 \mu\text{M}$                                                                                                  |                      |
| LAP4                  | TASQA EWFKARR<br>WQWRMKKLGA                        |                                             |                                                             | -6.28 (21.8) <sup>d,f</sup>                                                                                                           | $K_d=0.898 \mu\text{M}$                                                                                                 |                      |
| LAP5                  | EWFKARRWQWR<br>MKKLGA                              |                                             |                                                             | -7.63 (15.4) <sup>d,f</sup>                                                                                                           | $K_d=0.129 \mu\text{M}$                                                                                                 |                      |
| LAP6                  | EWFKARRWGWR<br>MKKLQA                              |                                             |                                                             | -7.45 (15.4) <sup>d,f</sup>                                                                                                           | $K_d=0.175 \mu\text{M}$                                                                                                 |                      |
| KLA80                 | KLALKLALKWAK<br>LALKAA                             | CD titration                                | POPC<br>POPG                                                | -4.91 <sup>b,f</sup><br>-7.20 <sup>b,f</sup>                                                                                          | $K_{app}=5100 \text{ M}^{-1}$<br>$K_{app}=2.5 \times 10^5 \text{ M}^{-1}$                                               | [31]                 |
| KLA100                | KLLAKAAKKWLL<br>LALKAA                             |                                             | POPG                                                        | -7.07 <sup>b,f</sup>                                                                                                                  | $K_{app}=2 \times 10^5 \text{ M}^{-1}$                                                                                  |                      |
| KLA120                | KLLAKAALKWLL<br>KALKAA                             |                                             | POPC<br>POPG                                                | -4.95 <sup>b,f</sup><br>-7.13 <sup>b,f</sup>                                                                                          | $K_{app}=5500 \text{ M}^{-1}$<br>$K_{app}=2.2 \times 10^5 \text{ M}^{-1}$                                               |                      |
| KLA140                | KALKKLLAKWLA<br>AAKALL                             |                                             | POPC<br>POPG                                                | -5.14 <sup>b,f</sup><br>-6.83 <sup>b,f</sup>                                                                                          | $K_{app}=7500 \text{ M}^{-1}$<br>$K_{app}=1.3 \times 10^5 \text{ M}^{-1}$                                               |                      |
| KLA160                | KLAAALLKKWKK<br>LAAALL                             |                                             | POPC<br>POPG                                                | -5.14 <sup>b,f</sup><br>-7.02 <sup>b,f</sup>                                                                                          | $K_{app}=7500 \text{ M}^{-1}$<br>$K_{app}=1.8 \times 10^5 \text{ M}^{-1}$                                               |                      |
| KLA180                | KALAALLKKWAK<br>LLAALK                             |                                             | POPG                                                        | -6.83 <sup>b,f</sup>                                                                                                                  | $K_{app}=1.3 \times 10^5 \text{ M}^{-1}$                                                                                |                      |

## Reference:

1. Wenk MR, Seelig J (1998) Magainin 2 amide interaction with lipid membranes: calorimetric detection of peptide binding and pore formation. *Biochemistry* 37: 3909-3916.
2. Wieprecht T, Beyermann M, Seelig J (1999) Binding of Antibacterial Magainin Peptides to Electrically Neutral Membranes: Thermodynamics and Structure. *Biochemistry* 38: 10377-10387.
3. Wieprecht T, Apostolov O, Seelig J (2000) Binding of the antibacterial peptide magainin 2 amide to small and large unilamellar vesicles. *Biophysical Chemistry* 85: 187-198.
4. Wieprecht T, Dathe M, Schumann M, Krause E, Beyermann M, et al. (1996) Conformational and Functional Study of Magainin 2 in Model Membrane Environments Using the New Approach of Systematic Double-d-Amino Acid Replacement. *Biochemistry* 35: 10844-10853.
5. Wieprecht T, Dathe M, Beyermann M, Krause E, Maloy WL, et al. (1997) Peptide Hydrophobicity Controls the Activity and Selectivity of Magainin 2 Amide in Interaction with Membranes. *Biochemistry* 36: 6124-6132.
6. Gregory S, Pokorny A, Almeida P (2009) Magainin 2 Revisited: A Test of the Quantitative Model for the All-or-None Permeabilization of Phospholipid Vesicles. *Biophysical Journal* 96: 116-131.
7. Schoch P, Sargent DF (1980) Quantitative analysis of the binding of melittin to planar lipid bilayers allowing for the discrete-charge effect. *Biochimica et Biophysica Acta (BBA) - Biomembranes* 602: 234-247.
8. Beschiasvili G, Seelig J (1990) Melittin binding to mixed phosphatidylglycerol/phosphatidylcholine membranes. *Biochemistry* 29: 52-58.
9. Rex S, Schwarz G (1998) Quantitative studies on the melittin-induced leakage mechanism of lipid vesicles. *Biochemistry* 37: 2336-2345.
10. Allende D, Vidal A, Simon SA, McIntosh TJ (2003) Bilayer interfacial properties modulate the binding of amphipathic peptides. *Chemistry and Physics of Lipids* 122: 65-76.
11. Allende D, Simon SA, McIntosh TJ (2005) Melittin-Induced Bilayer Leakage Depends on Lipid Material Properties: Evidence for Toroidal Pores. *Biophysical Journal* 88: 1828-1837.
12. Fernández-Vidal M, White SH, Ladokhin AS (2011) Membrane Partitioning: "Classical" and "Nonclassical" Hydrophobic Effects. *The Journal of Membrane Biology* 239: 5-14.
13. Rapaport D, Shai Y (1991) Interaction of fluorescently labeled pardaxin and its analogues with lipid bilayers. *Journal of Biological Chemistry* 266: 23769-23775.
14. Bhunia A, Domadia PN, Torres J, Hallock KJ, Ramamoorthy A, et al. (2010) NMR structure of pardaxin, a pore-forming antimicrobial peptide, in lipopolysaccharide micelles: mechanism of outer membrane permeabilization. *J Biol Chem* 285: 3883-3895.
15. Pouny Y, Rapaport D, Mor A, Nicolas P, Shai Y (1992) Interaction of antimicrobial dermaseptin and its fluorescently labeled analogs with phospholipid membranes. *Biochemistry* 31: 12416-12423.
16. Gaidukov L, Fish A, Mor A (2003) Analysis of Membrane-Binding Properties of Dermaseptin Analogues: Relationships between Binding and Cytotoxicity. *Biochemistry* 42: 12866-12874.
17. Verly RM, Rodrigues MA, Daghasanli KRP, Denadai AML, Cuccovia IM, et al. (2008) Effect of cholesterol on the interaction of the amphibian antimicrobial peptide DD K with liposomes. *Peptides* 29: 15-24.
18. Gazit E, Boman A, Boman HG, Shai Y (1995) Interaction of the Mammalian Antibacterial Peptide Cecropin P1 with Phospholipid Vesicles. *Biochemistry* 34: 11479-11488.
19. Gregory SM, Cavanaugh A, Journigan V, Pokorny A, Almeida PFF (2008) A Quantitative Model for the All-or-None Permeabilization of Phospholipid Vesicles by the Antimicrobial Peptide Cecropin A. *Biophysical Journal* 94: 1667-1680.
20. Silvestro L, Gupta K, Weiser JN, Axelsen PH (1997) The concentration-dependent membrane activity of cecropin A. *Biochemistry* 36: 11452-11460.
21. Clark KS, Svetlovics J, McKeown AN, Huskins L, Almeida PF (2011) What Determines the Activity of Antimicrobial and Cytolytic Peptides in Model Membranes. *Biochemistry* 50: 7919-7932.

22. Almeida PF, Pokorny A (2009) Mechanisms of Antimicrobial, Cytolytic, and Cell-Penetrating Peptides: From Kinetics to Thermodynamics. *Biochemistry* 48: 8083-8093.
23. Lewis JR, Cafiso DS (1999) Correlation between the free energy of a channel-forming voltage-gated peptide and the spontaneous curvature of bilayer lipids. *Biochemistry* 38: 5932-5938.
24. Abraham T, Lewis RN, Hodges RS, McElhaney RN (2005) Isothermal titration calorimetry studies of the binding of a rationally designed analogue of the antimicrobial peptide gramicidin s to phospholipid bilayer membranes. *Biochemistry* 44: 2103-2112.
25. Bastos M, Bai G, Gomes P, Andreu D, Goormaghtigh E, et al. (2008) Energetics and Partition of Two Cecropin-Melittin Hybrid Peptides to Model Membranes of Different Composition. *Biophysical Journal* 94: 2128-2141.
26. Bhargava K, Feix JB (2004) Membrane Binding, Structure, and Localization of Cecropin-Mellitin Hybrid Peptides: A Site-Directed Spin-Labeling Study. *Biophys J* 86: 329-336.
27. Sood R, Domanov Y, Pietiäinen M, Kontinen VP, Kinnunen PKJ (2008) Binding of LL-37 to model biomembranes: Insight into target vs host cell recognition. *Biochimica et Biophysica Acta (BBA) - Biomembranes* 1778: 983-996.
28. Andrushchenko VV, Aarabi MH, Nguyen LT, Prenner EJ, Vogel HJ (2008) Thermodynamics of the interactions of tryptophan-rich cathelicidin antimicrobial peptides with model and natural membranes. *Biochimica et Biophysica Acta (BBA) - Biomembranes* 1778: 1004-1014.
29. Ladokhin AS, Selsted ME, White SH (1997) Bilayer Interactions of Indolicidin, a Small Antimicrobial Peptide Rich in Tryptophan, Proline, and Basic Amino Acids. *Biophysical Journal* 72: 794-805.
30. Yamamoto N, Tamura A (2010) Designed low amphipathic peptides with alpha-helical propensity exhibiting antimicrobial activity via a lipid domain formation mechanism. *Peptides* 31: 794-805.
31. Dathe M, Meyer J, Beyermann M, Maul B, Hoischen C, et al. (2002) General aspects of peptide selectivity towards lipid bilayers and cell membranes studied by variation of the structural parameters of amphipathic helical model peptides. *Biochimica et Biophysica Acta (BBA) - Biomembranes* 1558: 171-186.
