# Supplementary material for: Activity Determinants of Helical Antimicrobial Peptides: A Large-Scale Computational Study
Source: PubMed Central journal article supplement (PMC3680375; doi:10.1371/journal.pone.0066440), 2013-06-12
Supplement: pone.0066440.s004.pdf [file pone.0066440.s004.pdf]

**Table S3. Biological activity of the peptides that do not have PDB structures.**

| Peptide            | MIC $\mu$ M<br>E. Coli | EC50 $\mu$ M  | Ref.  |
|--------------------|------------------------|---------------|-------|
| PGLa               | 4.06-8.12              | 406           | [1]   |
| Gramicidin S 14dK4 | 3.1-6.2                |               | [2]   |
| Dermaseptin S1     |                        | 12            | [3]   |
| Dermaseptin S4     |                        | 1.4 $\pm$ 0.2 |       |
| K4K20-S4           | 1-16                   | 0.5 $\pm$ 0.1 | [3,4] |
| K4-S4(1-16)a       | 1-8                    | 10 $\pm$ 0.5  |       |
| K4-S4(1-13)a       | 2-16                   | 57 $\pm$ 3    |       |
| K4-S4(1-10)a       |                        | >100          |       |
| Cecropin P         | 3.3                    |               | [5]   |
| DL-1               | 3.8                    | 4             | [6]   |
| LAP1               | 24                     |               | [7]   |
| LAP2               | 16                     |               |       |
| LAP3               | 24                     |               |       |
| LAP4               | 55                     |               |       |
| LAP5               | 6.0                    |               |       |
| LAP6               | 6.0                    |               |       |
| KLA80              | 3                      | 55            | [8]   |
| KLA100             | 3.1                    | 55            |       |
| KLA120             | 6.1                    | 15            |       |
| KLA140             | 6.0                    | 45            |       |
| KLA160             | 5.9                    | 60            |       |
| KLA180             | 5.9                    | 40            |       |

**References:**

1. Wieprecht T, Beyermann M, Seelig J (1999) Binding of Antibacterial Magainin Peptides to Electrically Neutral Membranes: Thermodynamics and Structure. *Biochemistry* 38: 10377-10387.
2. Kondejewski LH, Jelokhani-Niaraki M, Farmer SW, Lix B, Kay CM, et al. (1999) Dissociation of Antimicrobial and Hemolytic Activities in Cyclic Peptide Diastereomers by Systematic Alterations in Amphipathicity. *Journal of Biological Chemistry* 274: 13181-13192.
3. Gaidukov L, Fish A, Mor A (2003) Analysis of Membrane-Binding Properties of Dermaseptin Analogues: Relationships between Binding and Cytotoxicity. *Biochemistry* 42: 12866-12874.
4. Navon-Venezia S, Feder R, Gaidukov L, Carmeli Y, Mor A (2002) Antibacterial Properties of Dermaseptin S4 Derivatives with In Vivo Activity. *Antimicrobial Agents and Chemotherapy* 46: 689-694.
5. Gazit E, Boman A, Boman HG, Shai Y (1995) Interaction of the Mammalian Antibacterial Peptide Cecropin P1 with Phospholipid Vesicles. *Biochemistry* 34: 11479-11488.
6. Dhople VM, Nagaraj R (2005) Conformation and activity of  $\delta$ -lysin and its analogs. *Peptides* 26: 217-225.
7. Yamamoto N, Tamura A (2010) Designed low amphipathic peptides with  $\alpha$ -helical propensity exhibiting antimicrobial activity via a lipid domain formation mechanism. *Peptides* 31: 794-805.
8. Dathe M, Meyer J, Beyermann M, Maul B, Hoischen C, et al. (2002) General aspects of peptide selectivity towards lipid bilayers and cell membranes studied by variation of the structural parameters of amphipathic helical model peptides. *Biochimica et Biophysica Acta (BBA) - Biomembranes* 1558: 171-186.
