# Supplementary material for: Activity Determinants of Helical Antimicrobial Peptides: A Large-Scale Computational Study
Source: PubMed Central journal article supplement (PMC3680375; doi:10.1371/journal.pone.0066440), 2013-06-12
Supplement: pone.0066440.s005.pdf [file pone.0066440.s005.pdf]

**Table S4. Comparison of the free energy from explicit simulations with experimental binding free energy and transfer energy  $\langle \Delta W \rangle$  from IMM1.**

| Peptide       | Membrane       | $\Delta G_{c, \text{sim}}^0$ | $\Delta G_c^0$ | $\langle \Delta W \rangle$ | Ref.  |
|---------------|----------------|------------------------------|----------------|----------------------------|-------|
| Lactoferricin | DOPC           | $-1.05 \pm 0.39$             |                | $-0.9 \pm 0.1$             | [1]   |
|               | DOPG           | $-5.4 \pm 1.3$               | $-7.38^+$      | $-7.9 \pm 0.7$             | [2,3] |
| Protegrin     | DMPC/DMPG(7:3) | $-2.4 \pm 0.8$               | $-7^*$         | $-5.3 \pm 1.1$             | [4,5] |
| Indolicidin   | DOPC           | $-0.05 \pm 0.46$             | $-7.25$        | $-1.1 \pm 1.2$             | [6,7] |
|               | DOPC/DOPG(7:3) | $-1.94 \pm 0.56$             | $-8.97$        | $-5.5 \pm 0.8$             |       |
| Melittin      | DOPC           | $-10.66 \pm 1.35$            | $-5.4$         | $-13.1 \pm 0.7$            | [8,9] |

+ The experimental value is obtained for a truncated lactoferricin which has less charge, so the actual value should be more negative.

\* The standard state of the experiment is assumed to be  $\Delta G_c^0$ .

#### Reference:

1. Vivcharuk V, Tomberli B, Tolokh IS, Gray CG (2008) Prediction of binding free energy for adsorption of antimicrobial peptide lactoferricin B on a POPC membrane. *Physical Review E* 77.
2. Tolokh IS, Vivcharuk V, Tomberli B, Gray CG (2009) Binding free energy and counterion release for adsorption of the antimicrobial peptide lactoferricin B on a POPG membrane. *Physical Review E* 80.
3. Jing WG, Svendsen JS, Vogel HJ (2006) Comparison of NMR structures and model-membrane interactions of 15-residue antimicrobial peptides derived from bovine lactoferricin. *Biochemistry and Cell Biology-Biochimie Et Biologie Cellulaire* 84: 312-326.
4. Vivcharuk V, Kaznessis Y (2010) Free Energy Profile of the Interaction between a Monomer or a Dimer of Protegrin-1 in a Specific Binding Orientation and a Model Lipid Bilayer. *The Journal of Physical Chemistry B* 114: 2790-2797.
5. Lai JR, Epanand RF, Weisblum B, Epanand RM, Gellman SH (2006) Roles of salt and conformation in the biological and physicochemical behavior of protegrin-1 and designed analogues: Correlation of antimicrobial, hemolytic, and lipid bilayer-perturbing activities. *Biochemistry* 45: 15718-15730.
6. Yeh I-C, Ripoll DR, Wallqvist A (2012) Free Energy Difference in Indolicidin Attraction to Eukaryotic and Prokaryotic Model Cell Membranes. *The Journal of Physical Chemistry B* 116: 3387-3396.
7. Andrushchenko VV, Aarabi MH, Nguyen LT, Prenner EJ, Vogel HJ (2008) Thermodynamics of the interactions of tryptophan-rich cathelicidin antimicrobial peptides with model and natural membranes. *Biochimica et Biophysica Acta (BBA) - Biomembranes* 1778: 1004-1014.
8. Irudayam SJ, Berkowitz ML (2012) Binding and reorientation of melittin in a POPC bilayer: Computer simulations. *Biochimica et Biophysica Acta (BBA) - Biomembranes* 1818: 2975-2981.
9. Allende D, Simon SA, McIntosh TJ (2005) Melittin-Induced Bilayer Leakage Depends on Lipid Material Properties: Evidence for Toroidal Pores. *Biophysical Journal* 88: 1828-1837.
