# Supplementary material for: Activity Determinants of Helical Antimicrobial Peptides: A Large-Scale Computational Study
Source: PubMed Central journal article supplement (PMC3680375; doi:10.1371/journal.pone.0066440), 2013-06-12
Supplement: pone.0066440.s007.pdf [file pone.0066440.s007.pdf]

**Table S6. Transfer energy from planar membrane to pores.**

cyl: cylindrical pores. tor: toroidal pores.

| Peptide     | $\Delta\Delta W(\text{cyl-planar})$ |             |          | $\Delta\Delta W(\text{tor-planar})$ |             |          |
|-------------|-------------------------------------|-------------|----------|-------------------------------------|-------------|----------|
|             | 30% Anionic                         | 10% Anionic | Neutral  | 30% Anionic                         | 10% Anionic | Neutral  |
| <b>1amt</b> | -3.3±1.3                            | -3.1±1.5    | -2.4±0.5 | -4.4±0.5                            | -3.1±0.9    | -3.4±0.3 |
| <b>1d7n</b> | 1.3±0.6                             | -1.7±1.0    | -0.7±1.2 | -2.3±0.8                            | -3.9±0.9    | -2.7±1.6 |
| <b>1f0d</b> | 1.9±1.5                             | 2.8±1.0     | -0.8±2.5 | -2.8±2.7                            | -0.8±2.3    | -2.8±2.0 |
| <b>1f0e</b> | 2.0±2.2                             | 2.7±2.9     | -0.5±3.4 | -3.7±2.3                            | -3.4±2.1    | -3.6±3.0 |
| <b>1f0f</b> | 1.7±1.9                             | 2.6±0.8     | -3.6±0.5 | -5.0±2.0                            | -2.4±1.0    | -5.4±0.9 |
| <b>1fry</b> | 3.7±2.5                             | 2.6±4.0     | -2.4±4.7 | -3.7±4.3                            | -4.2±3.0    | -2.2±3.7 |
| <b>1hu5</b> | 3.4±5.2                             | -0.5±1.1    | -1.1±1.9 | -6.3±3.7                            | -1.8±7.7    | -6.8±1.2 |
| <b>1hu6</b> | 1.0±2.4                             | -1.0±1.6    | -1.2±2.5 | -4.9±1.4                            | -5.1±1.4    | -5.1±2.6 |
| <b>1hu7</b> | 2.0±2.0                             | -0.4±1.2    | -2.6±2.9 | -4.9±2.0                            | -5.2±1.4    | -6.3±2.5 |
| <b>1kv4</b> | 4.5±2.8                             | 1.5±3.3     | 0.2±1.3  | -4.7±2.7                            | -1.6±6.8    | -5.6±1.7 |
| <b>1lyp</b> | 13.8±1.2                            | 12.1±1.8    | 3.1±1.2  | -1.3±1.8                            | -0.4±2.3    | -7.5±1.6 |
| <b>1o53</b> | -6.6±1.3                            | 1.1±0.8     | -2.8±1.2 | -2.6±0.6                            | -1.9±0.8    | -4.8±0.7 |
| <b>1p0g</b> | 3.6±1.3                             | 1.2±2.4     | -0.2±1.8 | -6.3±0.8                            | -2.8±1.3    | -4.1±1.5 |
| <b>1p0j</b> | 2.7±3.0                             | -0.6±1.2    | -2.4±0.4 | -5.7±1.3                            | -5.0±0.6    | -5.2±0.4 |
| <b>1p0l</b> | 1.7±2.8                             | -0.5±0.9    | -1.9±0.8 | -5.3±2.1                            | -4.9±0.7    | -5.2±0.7 |
| <b>1p0o</b> | 2.1±2.5                             | -2.1±1.1    | -0.2±1.7 | -7.3±1.6                            | -6.0±0.3    | -6.1±1.3 |
| <b>1t51</b> | -1.8±1.8                            | 0.9±1.7     | -1.5±1.2 | -1.0±0.8                            | -1.5±1.5    | -2.7±1.5 |
| <b>1t52</b> | 2.6±0.8                             | 2.0±1.0     | -0.9±1.0 | -2.2±1.3                            | -2.4±0.9    | -3.7±0.9 |
| <b>1t54</b> | 1.5±0.9                             | 0.5±1.0     | -1.4±1.4 | -2.6±0.3                            | -1.9±1.4    | -2.8±0.9 |
| <b>1t55</b> | 6.1±1.3                             | 1.7±0.3     | -1.9±1.4 | -1.5±1.2                            | -0.9±0.8    | -3.2±1.0 |
| <b>1vm2</b> | -1.7±1.1                            | -0.4±0.5    | -2.1±0.4 | -4.2±0.5                            | -2.5±0.5    | -4.4±0.3 |
| <b>1vm3</b> | -0.1±0.3                            | -2.0±1.0    | -2.1±0.4 | -3.1±0.3                            | -2.9±0.8    | -4.2±0.4 |
| <b>1vm4</b> | -0.6±0.5                            | -1.5±0.7    | -2.7±0.5 | -3.8±0.5                            | -3.9±1.1    | -4.2±0.8 |
| <b>1vm5</b> | -1.3±0.4                            | -1.0±0.9    | -1.9±0.8 | -3.4±0.4                            | -2.5±0.6    | -3.8±0.8 |
| <b>1xc0</b> | 11.3±2.3                            | 1.2±2.5     | 3.3±2.1  | -3.3±2.7                            | 1.9±2.8     | 2.1±1.7  |
| <b>1xkm</b> | -8.2±3.5                            | 4.3±2.1     | -1.8±2.0 | -2.1±2.9                            | -0.1±1.7    | -4.0±1.8 |
| <b>1z64</b> | 4.4±1.6                             | 2.6±2.2     | -1.2±1.9 | -1.2±0.5                            | 0.0±0.7     | -2.0±0.9 |
| <b>1zrw</b> | -1.4±4.3                            | -1.3±4.0    | -1.6±4.2 | -6.4±5.5                            | -11.1±3.4   | -5.0±4.1 |
| <b>1zrx</b> | 1.5±1.8                             | 3.3±1.3     | -1.9±1.7 | -3.0±2.8                            | -1.3±3.1    | -2.5±2.1 |
| <b>2amn</b> | 4.9±2.9                             | -0.2±2.9    | -2.4±4.2 | -4.1±3.8                            | -4.5±3.6    | -6.0±1.7 |
| <b>2czp</b> | -4.9±5.0                            | 1.1±0.5     | -2.1±0.9 | -1.1±0.7                            | -2.0±0.6    | -3.6±1.1 |
| <b>2f3a</b> | 3.1±1.2                             | 0.7±0.9     | -1.0±1.6 | -5.3±1.4                            | -2.3±0.8    | -4.3±0.9 |
| <b>2fbs</b> | 1.5±0.9                             | 0.0±1.8     | -2.4±1.2 | -5.4±0.5                            | -4.1±1.2    | -4.5±1.3 |
| <b>2g9l</b> | 6.4±2.6                             | 3.4±1.2     | 1.1±1.3  | -4.3±4.2                            | -1.6±2.3    | -3.4±1.4 |
| <b>2g9p</b> | 1.5±1.2                             | 0.9±3.1     | 0.7±4.1  | -4.4±1.0                            | -3.9±2.3    | -3.7±1.5 |

Continued from previous page

| Peptide     | $\Delta\Delta W(\text{cyl-planar})$ |                |                | $\Delta\Delta W(\text{tor-planar})$ |                |                |
|-------------|-------------------------------------|----------------|----------------|-------------------------------------|----------------|----------------|
|             | 30% Anionic                         | 10% Anionic    | Neutral        | 30% Anionic                         | 10% Anionic    | Neutral        |
| <b>2gdl</b> | 0.7 $\pm$ 3.1                       | 2.4 $\pm$ 3.8  | -2.5 $\pm$ 2.7 | -1.8 $\pm$ 3.5                      | -0.7 $\pm$ 5.1 | -3.1 $\pm$ 2.9 |
| <b>2hfr</b> | 6.6 $\pm$ 3.7                       | -2.8 $\pm$ 3.5 | -2.8 $\pm$ 2.3 | -4.5 $\pm$ 4.3                      | -4.3 $\pm$ 3.8 | -3.1 $\pm$ 2.1 |
| <b>2jmy</b> | 0.4 $\pm$ 0.9                       | 2.4 $\pm$ 1.1  | -1.8 $\pm$ 1.1 | -4.7 $\pm$ 0.4                      | -3.9 $\pm$ 0.6 | -4.2 $\pm$ 0.9 |
| <b>2jos</b> | 1.2 $\pm$ 2.8                       | 0.8 $\pm$ 3.2  | 1.8 $\pm$ 2.0  | -3.0 $\pm$ 0.9                      | -2.2 $\pm$ 1.3 | -4.1 $\pm$ 0.7 |
| <b>2jpy</b> | 0.0 $\pm$ 1.1                       | -1.6 $\pm$ 0.6 | -0.8 $\pm$ 1.0 | -2.9 $\pm$ 1.0                      | -1.4 $\pm$ 0.6 | -3.5 $\pm$ 0.6 |
| <b>2jq0</b> | -3.3 $\pm$ 0.7                      | -0.5 $\pm$ 1.8 | -1.8 $\pm$ 1.0 | -2.8 $\pm$ 1.1                      | -2.0 $\pm$ 0.9 | -3.1 $\pm$ 2.4 |
| <b>2jq1</b> | -1.0 $\pm$ 0.9                      | -0.8 $\pm$ 1.6 | -1.3 $\pm$ 1.1 | -2.6 $\pm$ 1.1                      | -2.1 $\pm$ 0.8 | -4.8 $\pm$ 0.8 |
| <b>2jr8</b> | 7.1 $\pm$ 2.6                       | 4.2 $\pm$ 3.3  | -2.6 $\pm$ 1.1 | -2.5 $\pm$ 1.4                      | -3.5 $\pm$ 2.2 | -6.2 $\pm$ 1.7 |
| <b>2k10</b> | 6.8 $\pm$ 2.0                       | 3.0 $\pm$ 1.1  | -0.5 $\pm$ 5.4 | -3.1 $\pm$ 1.2                      | -2.4 $\pm$ 0.5 | -4.5 $\pm$ 1.3 |
| <b>2k38</b> | 0.6 $\pm$ 1.7                       | 2.9 $\pm$ 3.1  | -2.0 $\pm$ 1.1 | -0.7 $\pm$ 3.9                      | -2.5 $\pm$ 3.3 | -4.0 $\pm$ 2.6 |
| <b>2k6o</b> | 8.8 $\pm$ 1.4                       | 7.3 $\pm$ 2.7  | 2.4 $\pm$ 3.5  | -2.9 $\pm$ 2.2                      | -3.8 $\pm$ 4.1 | -1.0 $\pm$ 4.6 |
| <b>2k9b</b> | 1.3 $\pm$ 3.0                       | 3.7 $\pm$ 1.5  | -1.6 $\pm$ 2.5 | -1.7 $\pm$ 1.4                      | -2.3 $\pm$ 1.6 | -3.6 $\pm$ 2.6 |
| <b>2kam</b> | 6.2 $\pm$ 0.8                       | -3.0 $\pm$ 1.8 | -1.0 $\pm$ 2.0 | -5.5 $\pm$ 1.8                      | -3.0 $\pm$ 1.5 | -2.3 $\pm$ 0.9 |
| <b>2l3i</b> | 3.5 $\pm$ 4.7                       | 5.8 $\pm$ 3.6  | 0.7 $\pm$ 3.2  | -6.0 $\pm$ 3.1                      | -1.0 $\pm$ 4.4 | -4.5 $\pm$ 2.9 |
| <b>2lmf</b> | -4.3 $\pm$ 2.9                      | 2.5 $\pm$ 1.4  | -0.3 $\pm$ 2.2 | -2.8 $\pm$ 2.0                      | -1.7 $\pm$ 3.4 | -3.8 $\pm$ 3.1 |
| <b>2mag</b> | 3.6 $\pm$ 1.9                       | 0.6 $\pm$ 1.3  | -3.1 $\pm$ 2.4 | -3.5 $\pm$ 2.8                      | -2.8 $\pm$ 1.4 | -6.0 $\pm$ 0.7 |
| <b>2mlt</b> | 9.3 $\pm$ 2.0                       | -2.7 $\pm$ 2.2 | -0.5 $\pm$ 3.3 | -5.4 $\pm$ 1.2                      | -5.3 $\pm$ 2.5 | -3.0 $\pm$ 3.0 |
| <b>2pco</b> | -2.6 $\pm$ 2.2                      | 0.1 $\pm$ 3.3  | -2.8 $\pm$ 1.9 | -4.6 $\pm$ 3.1                      | -7.1 $\pm$ 3.0 | -6.6 $\pm$ 1.5 |
