# Supplementary material for: Activity Determinants of Helical Antimicrobial Peptides: A Large-Scale Computational Study
Source: PubMed Central journal article supplement (PMC3680375; doi:10.1371/journal.pone.0066440), 2013-06-12
Supplement: pone.0066440.s008.pdf [file pone.0066440.s008.pdf]

**Table S7. Hydrophobic quadrupole moment of studied peptides.**

$\langle Q \rangle_{\text{res}}$ : hydrophobic quadrupole moment per residue; Q : total hydrophobic quadrupole moment.

| PDBid       | $\langle Q \rangle_{\text{res}}$ | Q        | PDBid       | $\langle Q \rangle_{\text{res}}$ | Q       |
|-------------|----------------------------------|----------|-------------|----------------------------------|---------|
| <b>1amt</b> | 59.51                            | 1190.25  | <b>1zrw</b> | 34.04                            | 851.07  |
| <b>1d7n</b> | 39.39                            | 551.49   | <b>1zrx</b> | 63.48                            | 2665.96 |
| <b>1f0d</b> | 56.44                            | 1128.79  | <b>2amn</b> | 117.88                           | 3064.78 |
| <b>1f0e</b> | 72.91                            | 1458.29  | <b>2czp</b> | 28.06                            | 392.84  |
| <b>1f0f</b> | 66.45                            | 1196.15  | <b>2f3a</b> | 37.79                            | 491.26  |
| <b>1fry</b> | 41.06                            | 1190.80  | <b>2fbs</b> | 24.59                            | 319.66  |
| <b>1hu5</b> | 71.88                            | 1293.85  | <b>2g9l</b> | 106.60                           | 3944.05 |
| <b>1hu6</b> | 27.18                            | 489.18   | <b>2g9p</b> | 85.03                            | 2210.85 |
| <b>1hu7</b> | 95.36                            | 1716.53  | <b>2gdl</b> | 31.36                            | 972.27  |
| <b>1kv4</b> | 269.67                           | 11326.10 | <b>2hfr</b> | 246.98                           | 6668.33 |
| <b>1lyp</b> | 124.99                           | 3999.66  | <b>2jmy</b> | 20.74                            | 311.04  |
| <b>1o53</b> | 44.18                            | 574.34   | <b>2jos</b> | 84.77                            | 1864.98 |
| <b>1p0g</b> | 105.69                           | 2008.17  | <b>2jpy</b> | 103.67                           | 1969.73 |
| <b>1p0j</b> | 70.72                            | 1343.68  | <b>2jq0</b> | 50.27                            | 955.06  |
| <b>1p0l</b> | 78.89                            | 1498.99  | <b>2jq1</b> | 93.30                            | 1772.69 |
| <b>1p0o</b> | 50.27                            | 955.14   | <b>2jr8</b> | 132.16                           | 5550.72 |
| <b>1t51</b> | 70.31                            | 914.07   | <b>2k10</b> | 74.04                            | 1480.80 |
| <b>1t52</b> | 57.71                            | 750.19   | <b>2k38</b> | 103.33                           | 3306.56 |
| <b>1t54</b> | 32.65                            | 424.39   | <b>2k6o</b> | 97.26                            | 3598.73 |
| <b>1t55</b> | 52.03                            | 676.41   | <b>2k9b</b> | 160.50                           | 5296.50 |
| <b>1vm2</b> | 36.90                            | 479.73   | <b>2kam</b> | 55.20                            | 1435.20 |
| <b>1vm3</b> | 42.14                            | 547.82   | <b>2l3i</b> | 67.23                            | 2016.89 |
| <b>1vm4</b> | 41.98                            | 545.71   | <b>2lmf</b> | 34.01                            | 782.28  |
| <b>1vm5</b> | 43.68                            | 567.79   | <b>2mag</b> | 66.62                            | 1532.31 |
| <b>1xc0</b> | 138.83                           | 4581.39  | <b>2mlt</b> | 77.36                            | 2011.47 |
| <b>1xkm</b> | 81.43                            | 1791.46  | <b>2pco</b> | 67.31                            | 1750.01 |
| <b>1z64</b> | 101.92                           | 2548.07  |             |                                  |         |
